# Supplementary material for: Calving front monitoring at a subseasonal resolution: a deep learning application for Greenland glaciers
Source: Copernicus journal article supplement (doi:10.5194/tc-18-3315-2024), 2024-07-24
Supplement: Supplementary file 1 [file tc-18-3315-2024-supplement.pdf]

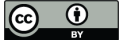

*Supplement of*

## **Calving front monitoring at a subseasonal resolution: a deep learning application for Greenland glaciers**

**Erik Loebel et al.**

*Correspondence to:* Erik Loebel ([erik.loebel@tu-dresden.de](mailto:erik.loebel@tu-dresden.de))

The copyright of individual parts of the supplement might differ from the article licence.

|       | Jakobshavn Isbræ | Sermeq Avangnardleq | Helheim Glacier | Kangerdlugssuaq Glacier | Daugaard-Jensen Glacier | Nigehalvfjærdsbræ | Zachariæ Isstrøm | Humboldt Glacier | Ingia Isbræ | Ryder Glacier | Academy Glacier | Hagen Bræ | Kangata Nunata Sermia | Hayes Glacier | Sverdrup Glacier | Uppernavik Isstrøm | Kong Oscar Glacier | Døcker-Smith Glacier | Harald Molke Bræ | Waltershausen Glacier | Tracy Glacier | Rink Isbræ | Store Glacier | Boydell Glacier | Drygalski Glacier | Storbreen | Upsala Glacier | Entries |
|-------|------------------|---------------------|-----------------|-------------------------|-------------------------|-------------------|------------------|------------------|-------------|---------------|-----------------|-----------|-----------------------|---------------|------------------|--------------------|--------------------|----------------------|------------------|-----------------------|---------------|------------|---------------|-----------------|-------------------|-----------|----------------|---------|
| 2013  | 4                | 1                   | 4               | 7                       | 1                       | 4                 | 3                | 2                | 4           | 4             | 4               | 6         | 3                     | 2             | 3                | 2                  | 1                  | 1                    | 3                |                       |               |            |               |                 |                   |           | 1              |         |
| 2014  | 5                | 3                   | 5               | 6                       | 8                       | 8                 | 8                | 3                | 2           | 2             | 6               | 10        | 8                     | 1             | 4                | 4                  | 1                  | 2                    | 5                |                       |               |            |               |                 |                   |           |                |         |
| 2015  | 8                | 3                   | 3               | 6                       | 6                       | 5                 | 6                | 3                | 3           | 4             | 6               | 4         | 9                     | 3             | 6                | 6                  | 5                  | 6                    | 5                |                       |               |            |               |                 |                   |           |                |         |
| 2016  | 10               | 3                   | 8               | 8                       | 11                      | 8                 | 9                | 4                | 5           | 7             | 5               | 6         | 8                     | 5             | 7                | 7                  | 5                  | 4                    | 5                |                       |               |            |               |                 |                   |           |                |         |
| 2017  | 7                | 3                   | 6               | 5                       | 10                      | 7                 | 7                | 2                | 3           | 5             | 4               | 6         | 4                     | 4             | 4                | 8                  | 4                  | 5                    | 4                |                       |               |            |               |                 |                   |           |                |         |
| 2018  | 8                | 2                   | 2               | 9                       | 13                      | 5                 | 5                | 4                | 4           | 4             | 2               | 9         | 8                     | 4             | 4                | 4                  | 4                  | 4                    | 4                |                       |               |            |               |                 |                   |           |                |         |
| 2019  | 6                | 6                   | 9               | 9                       | 8                       | 13                | 8                | 3                | 4           | 6             | 2               | 8         | 5                     | 7             | 9                | 8                  | 8                  | 7                    | 3                |                       |               |            |               |                 |                   |           |                |         |
| 2020  | 8                | 5                   | 5               | 5                       | 7                       | 4                 | 6                | 4                | 5           | 5             | 5               | 8         | 7                     | 6             | 5                | 7                  | 5                  | 5                    | 5                | 6                     | 5             | 5          | 3             | 4               | 5                 | 5         | 2              |         |
| 2021  | 2                | 1                   | 2               | 2                       | 2                       | 2                 | 2                | 1                | 2           | 2             | 2               | 2         | 2                     | 1             | 2                | 1                  | 2                  | 1                    | 1                | 2                     | 4             | 4          | 3             | 3               | 4                 | 3         | 3              |         |
| Total | 58               | 27                  | 44              | 57                      | 66                      | 56                | 54               | 26               | 32          | 39            | 36              | 59        | 54                    | 33            | 44               | 47                 | 35                 | 35                   | 35               | 8                     | 9             | 9          | 6             | 7               | 9                 | 8         | 5              | 898     |

**Figure S1.** Temporal coverage of the reference data used in this study. The numbers and the color intensity indicate the amount of calving front positions in the respective year. Calving fronts from 2013 to 2019 were used for model training, and calving fronts from 2020 and 2021 were used for model testing.

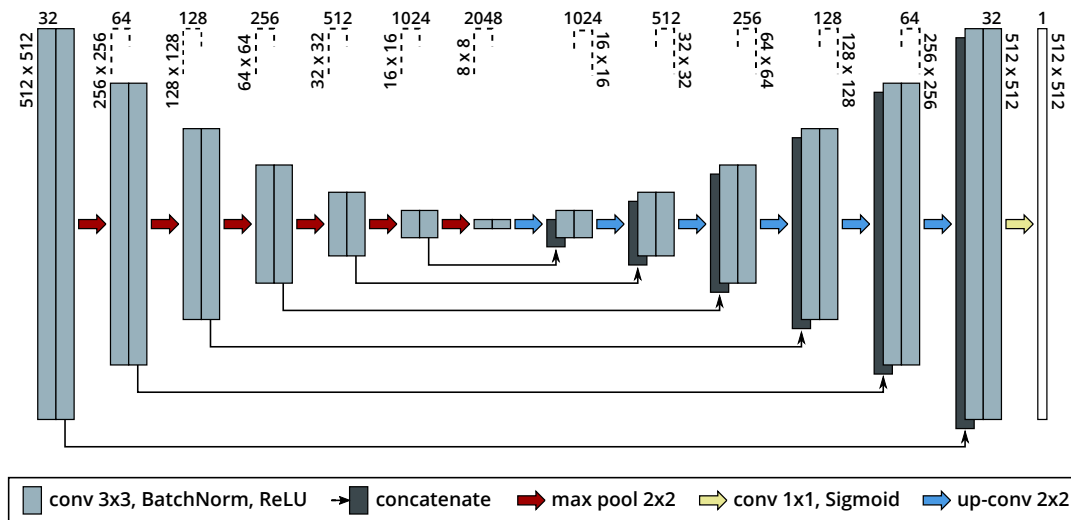

**Figure S2.** The U-Net based ANN architecture that was applied in this study. One single contracting sequence comprises convolutions followed by batch normalization, a rectified linear unit (ReLU), and a max-pooling operation. One single expanding sequence consists of concatenation with spatial context from the contracting path, convolutions followed by batch normalization, and a ReLU. All dimensions are denoted at the top of the blocks.

**Table S1.** Binary classification results of the TUD test set for the glacier/land class. The binary classification metrics accuracy, F1-Score and recall as well as the normalized confusion matrix are given. In addition, the standard deviation of the respective parameters is indicated. Example: TP is the amount of all glacier/land image pixels of the test data set that are correctly classified on average across all 50 models.

| Binary classification metrics |               |               | Normalized confusion matrix |               |               |               |
|-------------------------------|---------------|---------------|-----------------------------|---------------|---------------|---------------|
| Accuracy                      | F1-Score      | Recall        | TP                          | TN            | FP            | FN            |
| 0.987 ± 0.001                 | 0.982 ± 0.001 | 0.996 ± 0.001 | 0.334 ± 0.002               | 0.653 ± 0.001 | 0.011 ± 0.002 | 0.001 ± 0.001 |

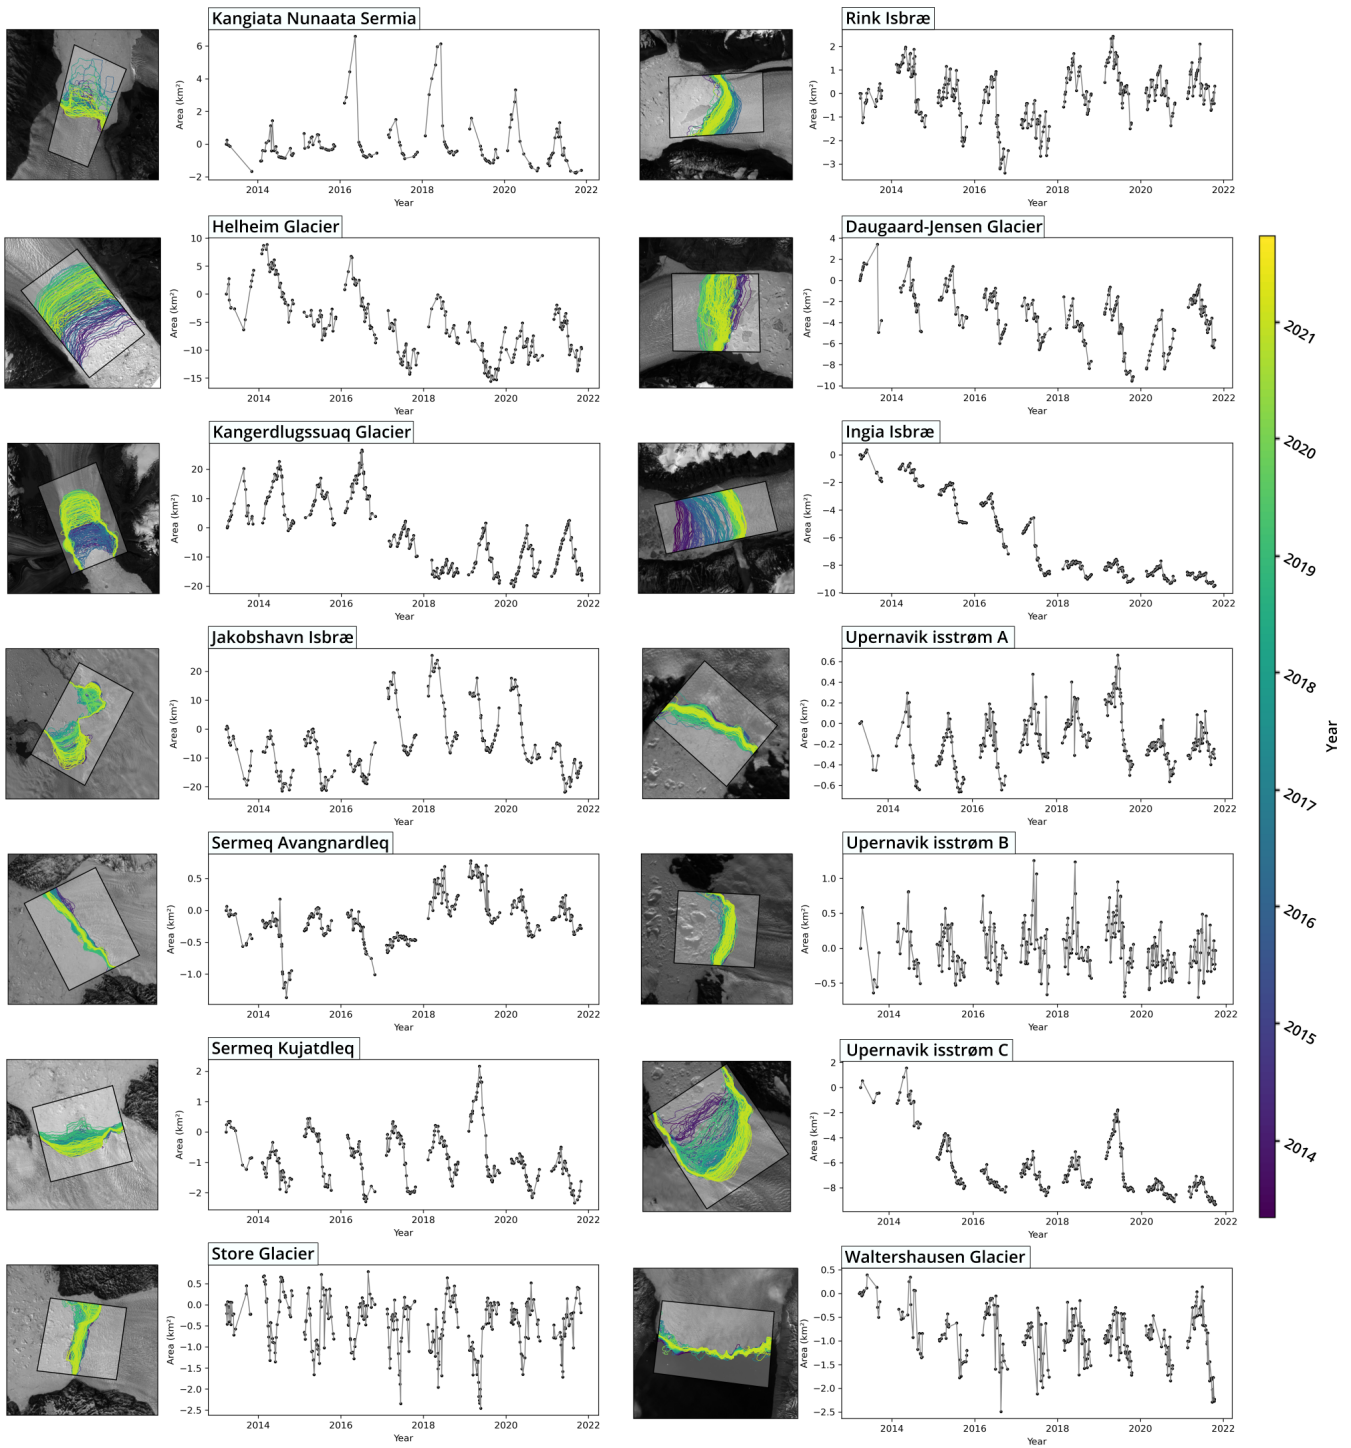

**Figure S3.** Time series generated by our ANN algorithm for 14 Greenland glaciers. For each glacier, a satellite image, containing the color-coded calving front trajectories, and the corresponding time series is shown. Here, calving front positions are marked by black dots and solid lines connecting entries each year. Note that the ordinate axis is scaled differently for each glacier. Landsat-8 imagery courtesy of the U.S. Geological Survey.

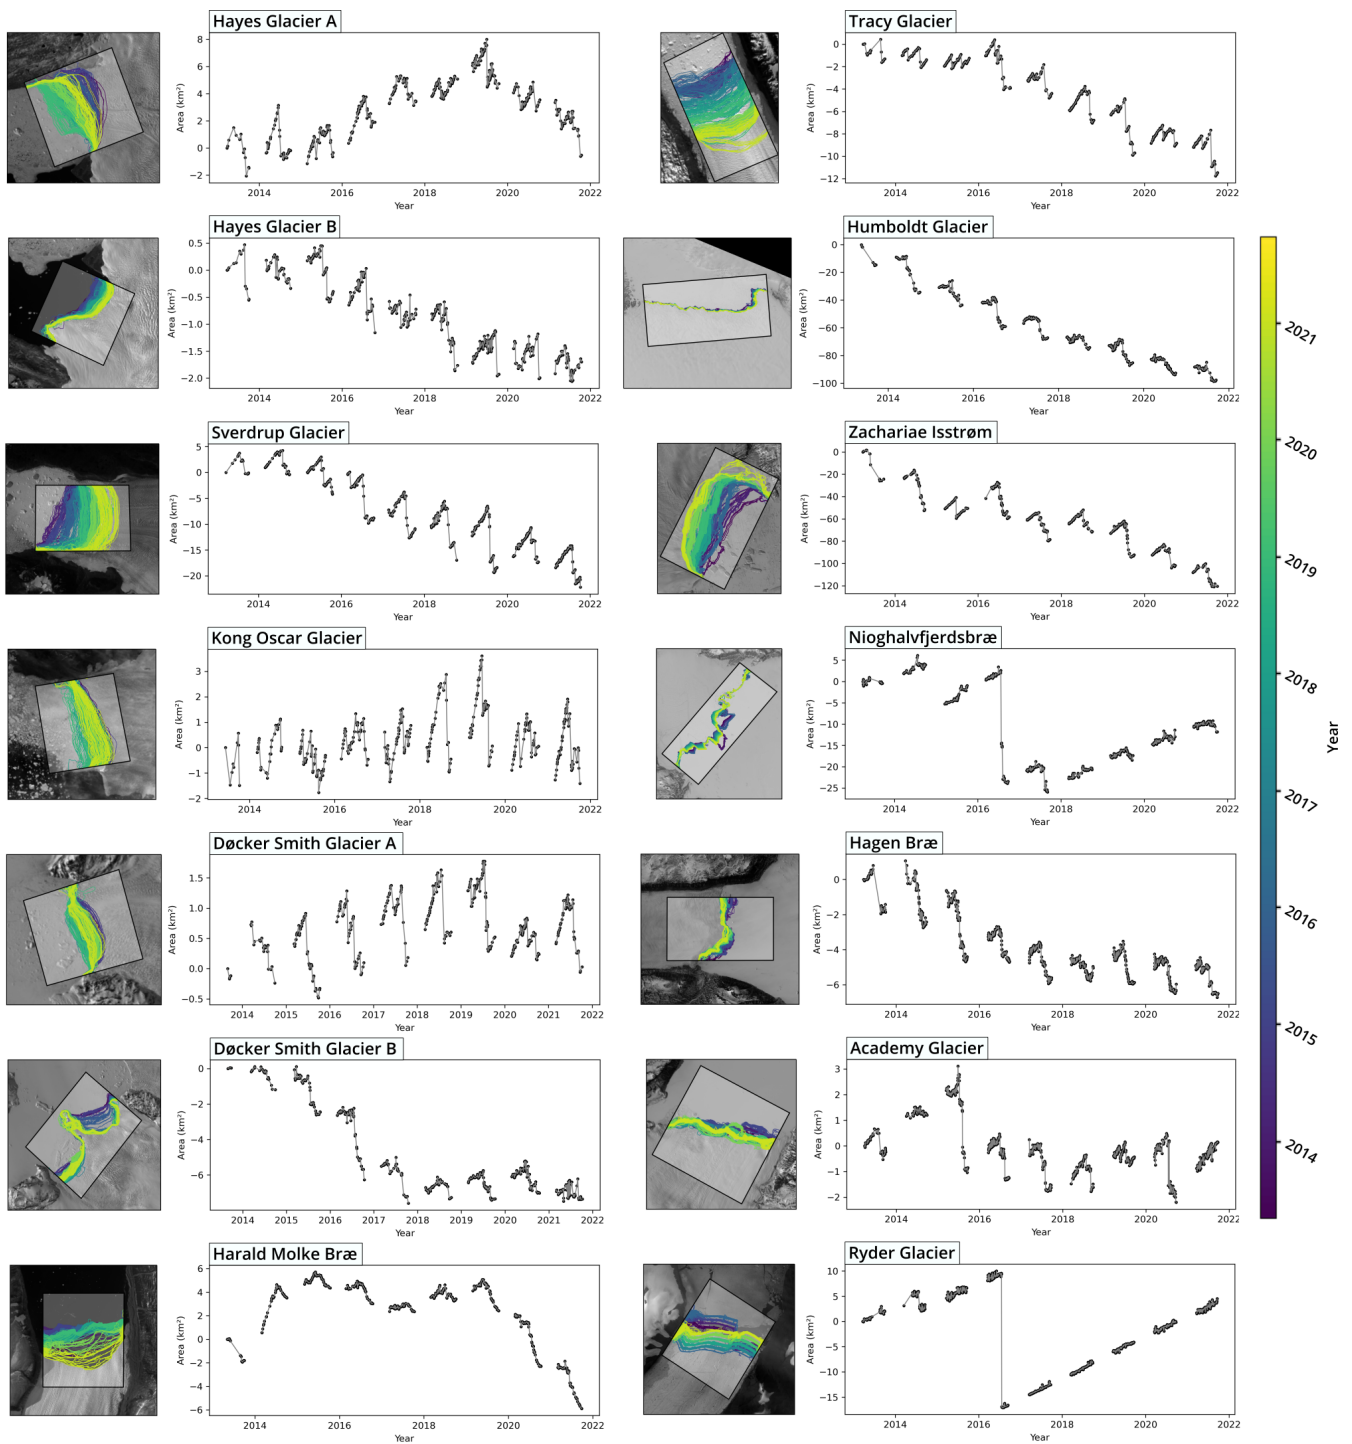

**Figure S4.** Time series generated by our ANN algorithm for 14 Greenland glaciers. For each glacier, a satellite image, containing the color-coded calving front trajectories, and the corresponding time series is shown. Here, calving front positions are marked by black dots and solid lines connecting entries each year. Note that the ordinate axis is scaled differently for each glacier. Landsat-8 imagery courtesy of the U.S. Geological Survey.
